# Supplementary material
Source: publisher site journal article supplement (https://www.dovepress.com/article/612630)
Supplement: Supplementary file 1 [file 612630%20Supplementary%20Materials.docx]

# Supplementary Material S1**：**Detailed Search Strategies

**1. Basic Retrieval Information**

**Databases**: Web of Science, PubMed, Embase

**Literature Screening Results**: Total initially retrieved literature = 250; Duplicate literature removed = 33; Final valid literature included = 217

**Retrieval Time Frame**: 2026.1

**2. Detailed Search Strategies by Database**

**2.1 Web of Science Core Collection**

**((((ALL=(macrophages)) AND ALL=(glucose metabolism)) AND ALL=(traditional Chinese medicine))) AND ALL=(kidney disease)**

**2.2 PubMed**

**((Kidneys) OR (Kideny)) AND (((((((((((((glycolysis OR "glycolytic reprogramming" OR "Warburg effect" OR "glucose metabolism") OR (Disorder, Glucose Metabolism)) OR (Disorders, Glucose Metabolism)) OR (Metabolism Disorder, Glucose)) OR (Metabolism Disorders, Glucose)) OR (Glucose Metabolic Disorder)) OR (Glucose Metabolic Disorders)) OR (Disorder, Glucose Metabolic)) OR (Disorders, Glucose Metabolic)) OR (Metabolic Disorder, Glucose)) OR (Metabolic Disorders, Glucose)) OR (Glucose Metabolism Disorder)) AND (((((((((((((macrophage OR macrophages OR "macrophage polarization") OR (Monocyte-Derived Macrophages)) OR (Monocyte Derived Macrophages)) OR (Macrophages, Monocyte-Derived)) OR (Macrophage, Monocyte-Derived)) OR (Macrophages, Monocyte Derived)) OR (Monocyte-Derived Macrophage)) OR (Bone Marrow-Derived Macrophages)) OR (Bone Marrow-Derived Macrophage)) OR (Bone Marrow Derived Macrophages)) OR (Macrophage, Bone Marrow-Derived)) OR (Macrophages, Bone Marrow-Derived)) AND ((((((("traditional Chinese medicine" OR TCM OR "Chinese herbal medicine" OR "Chinese herbal formula") OR (Chinese Drugs, Plant)) OR (Chinese Herbal Drugs)) OR (Herbal Drugs, Chinese)) OR (Plant Extracts, Chinese)) OR (Chinese Plant Extracts)) OR (Extracts, Chinese Plant))))**

**2.3 Embase**

(macrophage OR macrophages OR macrophage polarization) AND (glycolytic reprogramming OR glycolysis OR Warburg effect OR glucose metabolism) AND (renal fibrosis OR kidney fibrosis OR renal interstitial fibrosis) AND (traditional Chinese medicine OR TCM OR Chinese herbal medicine OR herbal extract OR herbal monomer OR curcumin OR berberine OR resveratrol) AND (cell experiment OR animal experiment OR clinical study OR in vitro OR in vivo OR cell culture OR animal model)

**3. Literature Screening & Duplicate Removal Process**

The literature screening process was conducted in accordance with the PRISMA 2020 guidelines. A total of 250 records were initially retrieved from the three databases. After importing all records into EndNote reference management software, automatic duplicate detection was performed, followed by manual verification to ensure accuracy. A total of 33 duplicate records were identified and excluded, resulting in 217 unique records for further screening.
